1  
2  
3  
4  
5  
6  
7  
8  
9  
10  
11  
12  
13  
14  
15  
16  
17  
18  
19  
20  
21  
22  
23  
24  
25  
26  
27  
28  
29  
30  
31  
32  
33  
34  
35  
36  
37  
38  
39  
40  
41  
42  
43  
44  
45  
46

## Copy number variants differ in frequency across genetic ancestry groups

Laura M. Schultz<sup>1,2,\*</sup>, Alexys Knighton<sup>3</sup>, Guillaume Huguet<sup>4</sup>, Zohra Saci<sup>4</sup>, Martineau Jean-Louis<sup>4</sup>,  
Josephine Mollon<sup>5</sup>, Emma E.M. Knowles<sup>5</sup>, David C. Glahn<sup>5</sup>, Sébastien Jacquemont<sup>4,6</sup>, Laura  
Almasy<sup>7,1,2\*</sup>

<sup>1</sup>Department of Biomedical and Health Informatics, Children’s Hospital of Philadelphia, Philadelphia, PA, USA

<sup>2</sup>Lifespan Brain Institute, Children’s Hospital of Philadelphia and the University of Pennsylvania, Philadelphia, PA, USA

<sup>3</sup>School of Arts and Sciences, University of Pennsylvania, Philadelphia, PA, USA

<sup>4</sup>CHU Sainte-Justine, Montréal, QC, Canada

<sup>5</sup>Department of Psychiatry, Boston Children’s Hospital, Harvard Medical School, Boston, MA, USA

<sup>6</sup>Department of Pediatrics, Université de Montréal, Montréal, QC, Canada

<sup>7</sup>Department of Genetics, Perelman School of Medicine, University of Pennsylvania, Philadelphia, PA, USA

\*Corresponding Authors:

Laura Almasy  
1016-C Abramson Research Center  
3615 Civic Center Blvd  
Philadelphia PA 19104 USA  
phone: 215-590-3031  
Email: [almasy@chop.edu](mailto:almasy@chop.edu)

Laura M. Schultz  
1016-B Abramson Research Center  
3615 Civic Center Blvd  
Philadelphia PA 19104 USA  
phone: 215-590-3244  
Email: [schultzl1@chop.edu](mailto:schultzl1@chop.edu)

### Abstract

Copy number variants (CNVs), which are duplicated or deleted genomic segments larger than 1000 base pairs<sup>1</sup>, have been implicated in a variety of neuropsychiatric and cognitive phenotypes<sup>2-4</sup>. In the first large-scale of examination of genome-wide CNV frequencies across ancestry groups, we found that deleterious CNVs are less prevalent in non-European ancestry groups than they are in European ancestry groups of both the UK Biobank (UKBB) and a US replication cohort (SPARK). We also identified specific recurrent CNVs that consistently differ in frequency across ancestry groups in both the UKBB and SPARK. These ancestry-related differences in CNV prevalence present in both an unselected community population and a family cohort enriched with individuals diagnosed with autism spectrum disorder (ASD) strongly suggest that genetic ancestry should be considered when probing associations between CNVs and health outcomes.

47 CNVs are associated with a wide range of human complex traits<sup>5-7</sup> and diseases<sup>8-11</sup>. They  
48 are especially well-studied in neurodevelopmental<sup>12-15</sup> and psychiatric disorders<sup>4,15-18</sup>, most  
49 notably ASD<sup>19-22</sup> and schizophrenia<sup>23-25</sup>. Unfortunately, most CNV association studies have been  
50 limited to European (EUR) ancestry groups<sup>2,5-9,11</sup> or pooled across ancestry groups<sup>10,13-15,17,19-</sup>  
51 <sup>21,23</sup>. While some studies have characterized CNVs in African (AFR)<sup>26-29</sup> and other non-EUR  
52 ancestry groups<sup>15,30-32</sup>, efforts to compare CNV frequencies across ancestry groups have been  
53 inconclusive due to limited sample sizes.<sup>14,33-40</sup> Since genetic variation among human  
54 populations<sup>41,42</sup> contributes to differential disease risk<sup>43-46</sup>, immune response<sup>47,48</sup>, and  
55 pharmacogenomics<sup>49,50</sup>, it is plausible that ancestry-related differences in CNV frequency could  
56 impact precision medicine. Hence, we took advantage of previously overlooked diversity within  
57 the UKBB to compare CNV frequency across four genetic ancestry groups: individuals with  
58 inferred EUR ( $n = 51,334$ ), South Asian (SAS;  $n = 8,848$ ), or AFR ( $n = 8,447$ ) ancestry plus a  
59 subset of EUR-ancestry individuals who self-identified as “white British” (WB;  $n = 385,636$ )  
60 **(Extended Data Fig. 1)**. Even though the SAS and AFR groups each represent about 2% of the  
61 UKBB, they are orders of magnitude larger than the non-EUR groups included in previous CNV  
62 studies.

63 When we considered all autosomal CNVs consisting of at least 50,000 base pairs, we  
64 found that the carrier frequency was generally similar across ancestry groups. Nonetheless,  
65 there were more deletion (DEL) carriers in the EUR and SAS groups and duplication (DUP)  
66 carriers in the WB group than expected given the group size **(Fig. 1a)**. For all ancestry groups,  
67 DEL carriers were more common than DUP carriers.

68           Given that CNVs have a range of effect sizes, as judged by their association with health  
69 outcomes or by their degree of evolutionary constraint, we considered several subsets of CNV  
70 carriers. First, we limited our analyses to carriers of a pre-selected set of recurrent CNVs with  
71 common breakpoints that were previously observed in multiple individuals and found to be  
72 associated with neuropsychiatric phenotypes (**Supplementary Table 1**). We observed 50  
73 unique recurrent deletions (**Supplementary Table 2**) and 60 unique recurrent duplications  
74 (**Supplementary Table 3**) at these loci in the UKBB. Of the 110 unique recurrent CNVs observed  
75 in the combined sample, 106 were present in the WB. The 4 CNVs not observed in the WB  
76 group were present in the EUR group, where we observed 77 unique recurrent CNVs. The 40  
77 unique recurrent CNVs observed in the AFR group and the 36 in the SAS group were subsets of  
78 those observed in the WB and EUR groups; none of the 110 recurrent CNVs were unique to the  
79 non-EUR ancestry groups in the UKBB. There were significantly fewer AFR-ancestry recurrent  
80 DEL and DUP carriers than expected under the null hypothesis that recurrent CNV carrier  
81 frequency is independent of ancestry group (**Fig. 1b**).

82           Next, we filtered CNV carriers using the loss-of-function observed/expected upper  
83 bound fraction (LOEUF)<sup>51</sup> constraint metric. When we limited our analyses to carriers of CNVs  
84 with constraint scores equivalent to disruption of at least two predicted loss-intolerant genes  
85 (i.e., total  $1/\text{LOEUF} \geq 5.7$  summed across the genes within the CNVs carried by an individual),  
86 ancestry-related differences persist and become even stronger. Consistent with previous  
87 evidence that DELs in coding sequences are under stronger purifying selection than DUPs<sup>52</sup>, the  
88 burden-filtered carrier frequency for DELs was substantially lower than that for DUPs for all four  
89 ancestry groups. The deleterious DEL carrier frequency for WB individuals was nearly twice

90 that of AFR or SAS individuals, both when we filtered by 1/LOEUF summed across all CNVs (**Fig.**  
91 **1c**) and when we limited the summation to recurrent CNVs (**Fig. 1d**). Likewise, carriers of  
92 deleterious DUPs were more prevalent in the WB group and less prevalent in the AFR group  
93 than expected. We obtained similar results when we excluded all individuals related at the  
94 third-degree or closer (**Extended Data Fig. 2; Supplementary Table 4**).

95 We also examined the prevalence of individual recurrent CNVs. To maximize power, we  
96 limited our analysis to the 11 recurrent CNVs (5 DELs and 6 DUPs) that each had a total of 275  
97 or more observations across the four ancestry groups. We found ancestry-related differences  
98 in the prevalence of 6 of these CNVs (**Fig. 2**), with some CNVs being more prevalent in WB  
99 individuals but others occurring at higher rates in the AFR and SAS groups. While there were  
100 some related individuals among the carriers of some of the CNVs, the pattern of frequency  
101 differences was essentially unchanged when we excluded all individuals with third-degree or  
102 closer relatives from the dataset (**Extended Data Fig. 3; Supplementary Table 4**). Hence, the  
103 observed differences cannot be explained by related individuals carrying the same CNVs.

104 Ascertainment bias is another potential explanation for the lower rate of deleterious  
105 CNVs in some ancestry groups within the UKBB. Immigrants may be less likely to participate in  
106 the UKBB, especially if they are carriers of deleterious CNVs. While EUR, AFR, and SAS  
107 individuals were more likely to have been born outside the UK or Ireland than WB individuals,  
108 the proportions of SAS and AFR individuals who were immigrants did not significantly differ for  
109 recurrent CNV carriers compared to non-carriers (**Extended Data Fig. 4**), suggesting that  
110 differential immigration rates cannot explain the differences in CNV prevalence across ancestry  
111 groups.

112 Demographic differences between the UKBB ancestry groups could also contribute to  
113 the observed differences in CNV prevalence. Individuals in the SAS and AFR ancestry groups  
114 tend to be younger than those in the WB and EUR groups, and the female-to-male ratios  
115 differed across the ancestry groups (**Supplementary Tables 5-6**). Furthermore, median  
116 Townsend deprivation index scores suggest that there are socioeconomic differences that could  
117 be associated with ancestry, sex, and recurrent CNV carrier status (**Supplementary Table 7**).  
118 We used propensity score matching to balance the sample sizes and control for the potentially  
119 confounding effects of these variables on CNV carrier rates by down-sampling the WB group to  
120 create two subgroups matched to the AFR and SAS groups (**Extended Data Fig. 5**;  
121 **Supplementary Tables 8-9**). The AFR-ancestry group had significantly lower odds of carrying  
122 both unfiltered and 1/LOEUF-filtered recurrent DELs and DUPs than its matched WB group (all  
123 two-sided Fisher's exact test  $p$ -values  $< .0000005$ ; **Fig. 3**). Indeed, the matched comparisons  
124 yielded more pronounced differences than the unmatched ones despite having smaller sample  
125 sizes. In contrast, differences between the SAS and matched WB group were somewhat  
126 attenuated. Nonetheless, the SAS group showed significantly lower odds of carrying 1/LOEUF-  
127 filtered recurrent DELs when compared to its matched WB group ( $p < .00001$ ).

128 We also used the matched datasets to compare the odds of carrying our 11 recurrent  
129 CNVs of interest (**Fig. 4**) and found that most of the observed ancestry-related differences in  
130 CNV prevalence remained significant. Using two-sided Fisher's exact tests of the carrier ORs,  
131 we found that the AFR group had significantly lower odds of carrying 2q13 *NPHP1* DEL, *CRYL1*  
132 DEL, 15q11.2 DEL, 15q13.3 BP4.5-BP5 *CHRNA7* DUP, 16p13.11 DUP, and 22q11.2 proximal (with  
133 LCR-A) DUP as well as higher odds of carrying 2q13 *NPHP1* DUP compared to its matched WB

134 group. The SAS group also had significantly lower odds of carrying 2q13 *NPHP1* DEL, *CRYL1* DEL,  
135 15q11.2 DEL, 15q13.3 BP4.5-BP5 *CHRNA7* DUP, and 22q11.2 proximal (with LCR-A) DUP and  
136 higher odds of carrying 2q13 *NPHP1* DUP compared to its matched WB group. Additionally, the  
137 SAS group had higher odds of carrying *ZNF92* DEL and 15q11.2 DUP compared to its matched  
138 WB group.

139 Finally, we replicated our study using SPARK, a younger United States cohort enriched  
140 with individuals diagnosed with ASD and ID (**Supplementary Tables 10-12**). We observed 51  
141 unique recurrent deletions (**Supplementary Table 13**) and 51 unique recurrent duplications  
142 (**Supplementary Table 14**) across the three largest inferred ancestry groups (**Extended Data Fig.**  
143 **6**) comprised of 46,869 EUR, 7,870 admixed American (AMR), and 3,680 AFR individuals. We  
144 used propensity score matching to balance the sample sizes and control for potentially  
145 confounding effects of ASD and ID status, age, and sex on recurrent CNV carrier rates by down-  
146 sampling the EUR group to create two subgroups matched to the AFR and AMR groups  
147 (**Extended Data Fig. 7; Supplementary Tables 15-16**). Replicating our UKBB results, we found  
148 that the SPARK AFR group had significantly lower odds of carrying both unfiltered and 1/LOEUF-  
149 filtered recurrent DELs and DUPs than its matched EUR group (all two-sided Fisher's exact test  
150  $p$ -values < .005; **Fig. 5**). The AMR group had significantly lower odds of carrying both unfiltered  
151 and 1/LOEUF filtered recurrent DUPs (two-sided Fisher's exact test  $p$ -values < .005; **Fig. 5**).

152 We also used the matched datasets to compare the odds of carrying the same 11  
153 recurrent CNVs we analyzed for the UKBB along with two additional recurrent CNVs that had at  
154 least 75 copies each in SPARK despite not meeting our inclusion criteria for the UKBB (**Fig. 6**).  
155 Replicating our UKBB results, the SPARK AFR group showed significant differences for 2q13

156 *NPHP1* DEL, 15q11 DEL, 2q13 *NPHP1* DUP, 15q13.3 BP4.5-BP5 *CHRNA7* DUP, and 16p13.11 DUP  
157 carrier odds relative to its matched EUR group (two-sided Fisher’s exact test  $p$ -values < .05).  
158 Additionally, the SPARK AFR group had significantly lower odds of carrying *NRXN1* DEL and  
159 higher odds of carrying 16p12.1 DEL relative to its matched EUR group, and the SPARK AMR  
160 group had significantly lower odds of carrying *NRXN1* DEL, 15q11.2 DEL, and 1q21 TAR DUP  
161 relative to its matched EUR group (two-sided Fisher’s exact test  $p$ -values < .05).

162 One potential explanation for the difference in prevalence of specific CNVs across  
163 ancestry groups is that population variation in the flanking sequence may affect the probability  
164 of deletions and duplications in a region. For example, chromosomal regions with polymorphic  
165 inversions have been shown to be enriched for recurrent CNVs associated with developmental  
166 delay and neuropsychiatric disorders.<sup>53</sup>

167 We demonstrated that ancestry-related differences in CNV carrier prevalence are  
168 present in both unselected community populations (UKBB) and cohorts enriched with ASD-  
169 diagnosed individuals (SPARK). We replicated the observed differences between the AFR and  
170 WB cohorts in the UKBB by comparing the AFR and EUR cohorts in SPARK, which is notable  
171 given the ascertainment differences, differing genotyping platforms (**Methods**), and presumed  
172 genetic differences between the homogeneous WB subset of the UKBB and a EUR-ancestry  
173 cohort from the United States<sup>54</sup>. Furthermore, SAS (UKBB) and AMR (SPARK) ancestry groups  
174 also exhibited unique patterns of CNV prevalence, demonstrating that differences in CNV  
175 carrier prevalence cannot be generalized as “EUR vs. non-EUR” differences.

176 Given that African populations have been shown to have greater genetic diversity<sup>55</sup>, the  
177 finding of fewer rare CNVs in the AFR groups of UKBB and SPARK is somewhat surprising. One

178 possible explanation for our ancestry-divergent results could be the “Euro-centric” focus of  
179 previous studies of genetic variants.<sup>43</sup> To focus on deleterious CNVs, we limited some of our  
180 analyses to recurrent CNVs that had been previously implicated in neuropsychiatric disorders  
181 and/or filtered our results based on the LOEUF metric. Our targeted recurrent CNVs were  
182 originally identified in cohorts dominated by EUR-ancestry individuals, so it is conceivable that  
183 there are as-yet-undiscovered CNVs with medical relevance that are more common in other  
184 ancestry groups. Also, the LOEUF constraint metric was derived from the gnomAD v2 reference  
185 database, which includes sequences from 64,603 individuals from European populations and  
186 only 12,487 individuals from African (or African-American) and 15,308 individuals from South  
187 Asian populations<sup>51</sup>. We expect that the discovery of additional recurrent CNVs, especially  
188 those smaller than 50 kb, will be facilitated by the increasing availability of long-read whole  
189 genome sequence data collected from diverse populations, such as *All of Us*<sup>40,56</sup>. In any case, it  
190 is likely that differing linkage disequilibrium patterns<sup>35</sup> and flanking sequences<sup>57</sup> also  
191 contributed to the ancestry-related differences in CNV frequency that we found. Future CNV  
192 studies utilizing long-read sequences should clarify the extent to which polymorphic differences  
193 in the flanking sequence across populations contribute to the observed differences in CNV  
194 frequency.

195         These findings are limited by the sample sizes of the AFR, SAS, and AMR ancestry groups  
196 in the UKBB and SPARK, which are much smaller than those of the WB and EUR ancestry  
197 groups. Larger CNV studies of diverse samples are needed. Additional limitations include our  
198 focus on only CNVs over 50 kilobases, a by-product of using genotype array data to call CNVs,  
199 and the choice of LOEUF as a metric of the deleteriousness of a CNV. Given that LOEUF is



200 focused on coding genes, non-coding CNVs that impact important regulatory elements may  
201 have been missed in our filtered set of deleterious CNVs with  $1/LOEUF \geq 5.7$ . Strengths of the  
202 study include the use of propensity score matching to address potential sources of bias and the  
203 consistency of results across samples with very different demographic profiles and  
204 ascertainment schemes.

205 Although classifying individuals into continental ancestry groups imposes discrete  
206 categories onto what is actually a continuum of human genetic variation<sup>58,59</sup>, it has nonetheless  
207 been a useful approach for considering the potential effects of population structure on  
208 genome-wide association analyses<sup>60,61</sup>. We recommend that CNV association studies also be  
209 adjusted for population structure, ideally in a quantitative way that reflects the continuous  
210 spectrum of genetic variation, to limit the risk of spurious discoveries.

## 211 212 **Methods**

### 213 214 ***Cohorts***

215  
216 We obtained de-identified genotype and phenotype data for the UK Biobank<sup>62</sup> (UKBB;  
217 application number 40980), a prospective population-based cohort of approximately 500,000  
218 United Kingdom residents who were 40-69 years old when they were recruited between 2006  
219 and 2010.

220 We replicated our primary results using data from Simons Powering Autism Research for  
221 Knowledge (SPARK)<sup>63</sup>, a United States cohort of children and dependent adults diagnosed with  
222 autism spectrum disorder (ASD) and their families.

223

## 224 **Genotyping and CNV Calling**

225 UKBB DNA samples were extracted from blood and genotyped on either the UK BiLEVE  
226 Axiom Array ( $n = 49,950$ ) or the UK Biobank Axiom Array ( $n = 438,427$ ) by Affymetrix. We  
227 selected 733,256 probes shared by the two arrays when mapped to hg19. Intensity data were  
228 used to call CNVs for the 459,855 individuals who remained after excluding 28,522 samples that  
229 failed to meet our quality control (QC) standards of genotype call rate  $> 0.95$ , |waviness factor|  
230  $< 0.05$ , log  $R$  ratio SD  $< 0.35$ , and B allele frequency SD  $< 0.08$ .

231 SPARK DNA samples were extracted from saliva and genotyped on four different  
232 Illumina Infinium arrays: Global Screening Array (GSA)-24 v1.0 ( $n = 26,868$ ), GSA-24 v2.0 ( $n =$   
233  $32,397$ ), CoreExome-24 v1.1 ( $n = 1,382$ ), and CoreExome-24 v1.3 ( $n = 6,024$ ). When mapped to  
234 hg19, the two GSA arrays had 617,394 autosomal SNPs in common with each other and  
235 218,457 SNPs in common with the 733,256 probes used to call CNVs for the UKBB, and the  
236 CoreExome arrays had 514,277 autosomal SNPs in common with each other and 98,648 in  
237 common with the UKBB probes. The four Illumina arrays had a total of 514,273 autosomal  
238 SNPs in common. Intensity data were used to call CNVs for the 65,425 individuals who  
239 remained after excluding the samples that failed to meet the same QC standards listed above  
240 for the UKBB.

241 CNVs were called in parallel by PennCNV<sup>64</sup> and QuantiSNP<sup>65</sup> using our previously  
242 published pipeline<sup>66,67</sup>. Both algorithms combine normalized intensity data with log  $R$  ratio  
243 (LRR) and B allele frequency (BAF) into hidden Markov models to detect CNVs that meet the  
244 following criteria: coverage  $\geq 3$  consecutive probes, size  $\geq 1$  kB, and confidence score  $\geq 15$ .  
245 CNVs jointly detected by both algorithms were merged using CNVision<sup>68</sup>, and a CNV inheritance

246 algorithm was used to concatenate adjacent duplications (DUPs) or deletions (DELs) separated  
247 by a gap no larger than 150 kB. Only CNVs meeting the following criteria were selected for  
248 further analyses: confidence score  $\geq 30$  for at least one detection algorithm; size  $\geq 50$  kB;  
249 unambiguous type (DUP or DEL); and less than 50% overlap with segmental duplicates, HLA  
250 regions, or centromeric regions.

251

### 252 ***Genetic Ancestry Inference***

253 Ten principal components (PCs) were computed from the imputed genotypes supplied  
254 by the UKBB (Data-Field 22828; v.3) and projected onto the 1000 Genomes PC space using KING  
255 v2.2.4<sup>69</sup>. Genetic ancestry was inferred from these PCs via a support vector machine algorithm  
256 using the e1071 R package<sup>70</sup>. Additionally, a subset of 385,636 European-ancestry individuals  
257 who self-identified as being "white British" (Data-Field 22006) was defined; the white British  
258 (WB) subgroup formed a tight subcluster within the European-ancestry cluster on the PC2 vs.  
259 PC1 plot (**Extended Data Fig. 1a**). All subsequent analyses were limited to these WB individuals  
260 in addition to 51,334 other European (EUR), 8,848 South Asian (SAS), and 8,447 African (AFR)  
261 ancestry individuals. While KING called the ancestry whenever the posterior probability was at  
262 least 65%, the majority (93.2%) of the calls were made with posterior probability  $\geq 90\%$   
263 (**Extended Data Fig. 1b**), suggesting that admixture was limited. Nonetheless, we recognize  
264 that genetic ancestry is continuous and does not equate with self-identified ethnicity (Data-  
265 Field 21000; **Extended Data Fig. 1c**).

266 Genetic ancestry was inferred using this same approach for the SPARK samples included  
267 in the iWESv2 or the WGS1-3 data releases. After excluding any individuals who were missing

268 from the *individuals\_registration* file supplied with the July 2023 SPARK V10 release, we limited  
269 all subsequent analyses to 46,869 EUR, 7,870 admixed American (AMR) and 3,680 AFR ancestry  
270 individuals (**Extended Data Fig. 6; Supplementary Tables 10-12**).

271

## 272 **CNV Annotation**

273 CNVs were annotated in GRCh37 using GENCODE Release 35  
274 ([https://www.genecodegenes.org/human/release\\_35lift37.html](https://www.genecodegenes.org/human/release_35lift37.html)) and Ensembl  
275 (<https://grch37.ensembl.org/index.html>). Genes that were fully contained within a CNV were  
276 identified, and the inverse loss-of-function observed/expected upper-bound fraction (1/LOEUF)  
277 from gnomAD (version 2.1.1)<sup>51</sup> was summed across all full genes contained within all CNVs  
278 detected for each study participant. A CNV was classified as a "recurrent CNV" if it met defining  
279 criteria for any of a pre-selected set of recurrent and single-gene autosomal CNVs that have  
280 been previously associated with neurodevelopmental or neuropsychiatric phenotypes  
281 (**Supplementary Table 1**). Partial genes were also included in the 1/LOEUF calculations for  
282 these recurrent CNVs. We use "all CNVs" to refer to these pre-selected recurrent CNVs plus all  
283 other CNVs over 50kB. An individual's total 1/LOEUF was summed across full genes for all CNVs  
284 as well as any partial genes that were included in the pre-defined recurrent CNVs, whereas total  
285 1/LOEUF calculations made for an individual's recurrent CNVs were limited to the full and  
286 partial genes present within these pre-defined recurrent and single-gene CNVs. We observed  
287 50 unique recurrent DELs (**Supplementary Table 2**) and 60 unique recurrent DUPs  
288 (**Supplementary Table 3**) across our four defined UKBB ancestry groups. For the SPARK  
289 replication, we limited our analyses to the 51 unique recurrent DELs (**Supplementary Table 13**)

290 and 51 unique recurrent DUPs (**Supplementary Table 14**) we observed across the three defined  
291 SPARK ancestry groups.

292

### 293 ***Carrier Prevalence***

294 We calculated carrier prevalence as the number of individuals within a given ancestry  
295 group who carried at least one of a given class of CNV divided by the total number of individuals  
296 in that ancestry group. For the UKBB, prevalence calculations were made for the following  
297 classes: (1) carriers of at least one DEL > 50kB, (2) carriers of at least one DUP > 50kB, (3)  
298 carriers of at least one of 50 pre-defined recurrent DELs (**Supplementary Table 2**), (4) carriers  
299 of at least one of 60 pre-defined recurrent DUPs (**Supplementary Table 3**), (5) carriers of at  
300 least one DEL with a total 1/LOEUF of at least 5.7 summed across all full genes included in all  
301 DELs plus any partial genes included in any of 50 pre-defined recurrent DELs, (6) carriers of at  
302 least one DUP with a total 1/LOEUF of at least 5.7 summed across all full genes included in all  
303 DUPs plus any partial genes included in any of 60 pre-defined recurrent DUPs, (7) carriers of at  
304 least one of the 50 pre-selected recurrent DELs with a total 1/LOEUF of at least 5.7 summed  
305 across full and partial genes included in those recurrent DELs, and (8) carriers of at least one of  
306 the 60 pre-selected recurrent DUPs with a total 1/LOEUF of at least 5.7 summed across full and  
307 partial genes included in those recurrent DUPs. Prevalence calculations for the SPARK  
308 replication were limited to (1) carriers of at least one of 51 pre-defined recurrent DELs  
309 (**Supplementary Table 13**), (2) carriers of at least one of 51 pre-defined recurrent DUPs  
310 (**Supplementary Table 14**), (3) carriers of at least one of the 51 pre-selected recurrent DELs  
311 with a total 1/LOEUF of at least 5.7 summed across full and partial genes included in those

312 recurrent DELs, and (4) carriers of at least one of the 51 pre-selected recurrent DUPs with a  
313 total 1/LOEUF of at least 5.7 summed across full and partial genes included in those recurrent  
314 DUPs. We used a threshold of total 1/LOEUF = 5.7, which corresponds to approximately two  
315 intolerant genes, as a means of identifying carriers of deleterious CNVs.

316 We also evaluated ancestral differences in carrier prevalence for 5 individual recurrent  
317 DELs (*NRXN1*, 2q13 *NPHP1*, *ZNF92*, *CRYL1*, and 15q11.2) and 6 individual recurrent DUPs  
318 (1q21.1 TAR, 2q13 *NPHP1*, 15q11.2, 15q13.3 BP4.5-BP5 *CHRNA7*, 16p13.11, and 22q11.2) in the  
319 UKBB. A recurrent CNV was selected for this round of analysis if it had at least 275 total  
320 observations in the combined UKBB dataset. We chose this threshold *a priori* because, under  
321 the null hypothesis that CNV carrier prevalence is not associated with ancestry (i.e., they are  
322 equally distributed across the ancestry groups), we would expect at least five carriers of each  
323 CNV in the AFR and SAS ancestry groups. For the SPARK replication, we analyzed the same  
324 eleven recurrent CNVs we selected for analysis for the UKBB along with two additional CNVs,  
325 16p11.2 proximal DEL and 16p12.1 DEL, that each had more than 75 observations in SPARK  
326 (since we would expect at least 5 observations of these CNVs in the AFR and AMR groups under  
327 our null hypothesis) but did not meet our inclusion criteria for the UKBB.

328

### 329 ***Sensitivity Analysis***

330 We repeated our carrier prevalence calculations after excluding all individuals who had  
331 a least one third-degree or closer relative in the full UKBB dataset. Since these exclusions  
332 reduced our sample sizes (**Supplementary Tables 4-6**) without altering our primary findings

333 **(Supplementary Table 4; Extended Data Figs. 2 and 3)**, all subsequent UKBB analyses were run  
334 using only the full dataset.

335

### 336 ***Environmental Phenotypes***

337 Next, we explored whether the observed ancestry-related differences in CNV carrier  
338 prevalence could be explained by ascertainment differences. Hypothesizing that recent  
339 immigrants may be genetically fitter and, hence, less likely to possess recurrent CNVs, we  
340 compared the birth countries (Data-field 1647) of the recurrent CNV carriers within each  
341 ancestry group to those of the non-carriers (**Extended Data Fig. 4**) and quantified the difference  
342 for each ancestry group with the ratio of the odds of being a recurrent CNV carrier when born  
343 within the UK or Ireland to the odds when born elsewhere. Individuals born in England, Wales,  
344 Scotland, Northern Ireland, or the Republic of Ireland were coded as being born within the UK  
345 or Ireland. Individuals who indicated they did not know their place of birth or preferred not to  
346 answer were excluded from this analysis.

347 We also considered whether Townsend Deprivation Index (TDI; Data-field 189), a proxy  
348 for socioeconomic status, differed between ancestry groups or based on recurrent CNV carrier  
349 status (**Supplementary Table 7**). TDI scores were assigned to each subject based on the postal  
350 code where they resided immediately prior to enrolling in the UKBB. Note that larger, more  
351 positive TDI scores are associated with a higher degree of deprivation.

352

353 **Propensity Score Matching**

354           Given the unbalanced sample sizes, sex ratios, age distributions, and TDI distributions  
355 across the four ancestry groups in the UKBB (**Supplementary Tables 5 and 7**), we employed  
356 propensity-score matching to control for these potentially confounding variables before  
357 running another round of analyses. After excluding individuals who were missing age and/or  
358 TDI data, we used the MatchIt<sup>71</sup> R package to make two sets of 1:1 nearest neighbor matches  
359 without replacement by estimating a propensity score via logistic regression of ancestry on TDI,  
360 age, and sex (**Extended Data Fig. 5**). One WB subgroup (WB-AFR;  $n = 8,425$ ) was matched to  
361 the remaining AFR individuals ( $n = 8,425$ ), and a second WB subgroup (WB-SAS;  $n = 8,835$ ) was  
362 matched to the remaining SAS individuals ( $n = 8,835$ ); we did not include the EUR group in this  
363 round of analyses. The matching procedure yielded good balance, as evidenced by  
364 standardized mean differences and empirical CDF statistics close to zero and variance ratios  
365 close to one for both the WB-AFR matches (**Supplementary Table 8**) and WB-SAS matches  
366 (**Supplementary Table 9**).

367           We used odds ratios (ORs) to quantify the differences in carrier frequency between the  
368 matched datasets. Odds were calculated as the number of carriers divided by the number of  
369 non-carriers within a given group. Then, two sets of ORs were computed by dividing the AFR  
370 odds by the WB-AFR odds and the SAS odds by the WB-SAS odds. These ORs were computed  
371 for the same four classes of recurrent CNVs and 11 individual recurrent CNVs that were  
372 described above.

373           The SPARK replication dataset also had confounding variables that we controlled using  
374 propensity score matching. Not only do the sex ratios and ages vary substantially between ASD



375 cases and controls and between ancestry groups, but the relative proportions of ASD cases with  
376 and without intellectual disability (ID) also differ across the ancestry groups (**Supplementary**  
377 **Tables 10 and 12**). We distinguished between cases and controls using the *asd* variable from  
378 the *individuals\_registration* file and assigned ID status to the cases using the  
379 *derived\_cog\_impair* variable from the *predicted\_iq\_experimental* file included in the SPARK  
380 V10 release.

381         After excluding individuals who were missing age or ID data, we used the MatchIt<sup>71</sup> R  
382 package to make two sets of 1:1 nearest neighbor matches without replacement by estimating  
383 a propensity score via logistic regression of ancestry on combined ASD/ID status (i.e., control,  
384 ASD without ID, or ASD with ID), age, and sex (**Extended Data Fig. 7**). One EUR subgroup (EUR-  
385 AFR;  $n = 3,473$ ) was matched to the remaining AFR individuals ( $n = 3,473$ ), and a second EUR  
386 subgroup (EUR-AMR;  $n = 7,405$ ) was matched to the remaining AMR individuals ( $n = 7,405$ ). The  
387 matching procedure yielded good balance, as evidenced by standardized mean differences and  
388 empirical CDF statistics close to zero and variance ratios close to one for both the EUR-AFR  
389 matches (**Supplementary Table 15**) and EUR-AMR matches (**Supplementary Table 16**).

390         We used ORs to quantify the differences in carrier frequency between the matched  
391 SPARK datasets. Odds were calculated as the number of carriers divided by the number of non-  
392 carriers within a given group. Then, two sets of ORs were computed by dividing the AFR odds  
393 by the EUR-AFR odds and the AMR odds by the EUR-AMR odds. These ORs were computed for  
394 the same four classes of recurrent CNVs and the 13 individual recurrent CNVs that were  
395 described above.

396

397 **Statistical Analyses**

398 R (version 4.2.1)<sup>72</sup> was used to run statistical analyses and generate graphical displays.  
399 Carrier prevalence differences among the four unmatched UKBB ancestry groups were  
400 evaluated for statistical significance using chi-square tests for independence with simulated  $p$ -  
401 values (2000 iterations). All tests included an additional "none of the above" group (not  
402 included in the figures) so that a given observed proportion (i.e., observed count /  $n$ ) was  
403 equivalent to carrier prevalence. Significant differences between expected and observed carrier  
404 counts were identified using Benjamini-Hochberg FDR-corrected  $p$ -values assigned to the  
405 standardized residuals. The ORs for the matched UKBB comparisons (AFR vs. WB-AFR and SAS  
406 vs. WB-SAS) and matched SPARK comparisons (AFR vs. EUR-AFR and AMR vs. EUR-AMR) were  
407 evaluated using two-sided Fisher's exact test  $p$ -values and plotted with their corresponding 95%  
408 confidence intervals. We conducted a Mantel-Haenszel test of homogeneity to compare the  
409 ancestry-specific birth location ORs for the UKBB, and we used two-sided Fisher's exact tests to  
410 evaluate whether the odds of being a recurrent CNV carrier were lower for individuals of given  
411 ancestry group who were born outside the UK or Ireland (i.e., immigrants) than they were for  
412 those born within the UK or Ireland. We plotted the Mantel-Haenszel pooled OR and ancestry-  
413 specific birthplace ORs with their 95% Wald confidence intervals.

414  
415 **Data Availability**

416  
417 Raw genotype and phenotype data are available via application to the UK Biobank  
418 (<https://www.ukbiobank.ac.uk/>). Approved researchers can obtain the SPARK dataset  
419 described in this study by applying at <https://base.sfari.org>.

420

421 **Code Availability**

422

423 Custom Python code and a detailed description of our CNV calling pipeline is provided at

424 <https://martineaujeanlouis.github.io/MIND-GENESPARALLELCNV/>.

425

426 **Acknowledgements**

427 This work used the UK Biobank, a major biomedical database, under application number

428 40980 and was funded by the National Institute of Mental Health (NIMH) grant number U01-

429 MH119690. We are grateful to all the families in SPARK, the SPARK clinical sites, and SPARK

430 staff, and we appreciate obtaining access to phenotypic and genetic data on SFARI Base.

431

432 **Figures and Legends**

433

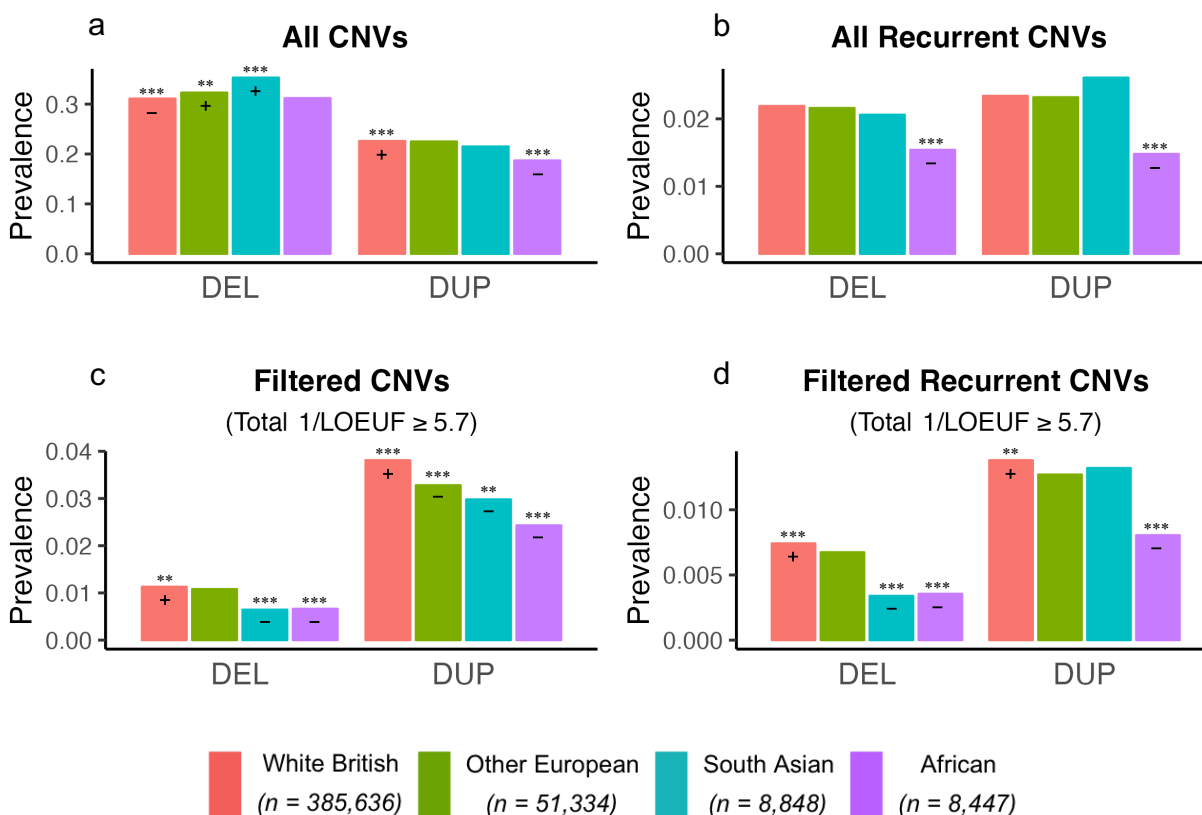

434

435

436 **Fig. 1: CNV carrier prevalence by ancestry group in the UK Biobank.** **a.** When CNVs are not  
 437 filtered based on recurrence or burden, deletion (DEL) carrier prevalence is higher than  
 438 expected for the South Asian ancestry group (SAS), and duplication (DUP) carrier prevalence is  
 439 lower than expected for the African ancestry group (AFR) ( $\chi^2 = 146.7$ ). **b.** When considering  
 440 only recurrent CNVs, there were fewer AFR DEL and DUP carriers than expected ( $\chi^2 = 48.145$ ).  
 441 **c.** Filtering instead on burden (total 1/LOEUF  $\geq 5.7$ ), there were fewer DEL and DUP carriers  
 442 than expected for both AFR and SAS ( $\chi^2 = 126.89$ ). **d.** Limiting to carriers of recurrent CNVs with  
 443 total 1/LOEUF  $\geq 5.7$ , DEL carrier prevalence was lower than expected for both AFR and SAS, but  
 444 DUP carrier prevalence was only lower than expected for AFR ( $\chi^2 = 61.397$ ). Plus signs indicate  
 445 significantly higher than expected carrier prevalence, and minus signs indicate significantly  
 446 lower than expected carrier prevalence. Ancestry-specific carrier prevalence was computed as  
 447 the number of carriers of at least one DEL (or DUP) divided by the total number of individuals in  
 448 that ancestry group. Simulated  $p$ -values (2000 replicates) were less than .0005 for all four chi-  
 449 square tests of independence. 1/LOEUF, inverse loss-of-function observed/expected upper-  
 450 bound fraction; \*\*FDR-corrected  $p$ -value < .005; \*\*\*FDR-corrected  $p$ -value < .0005. An  
 451 additional category ("Neither") that was included in each chi-square test is not shown in the bar  
 452 charts.

453

454

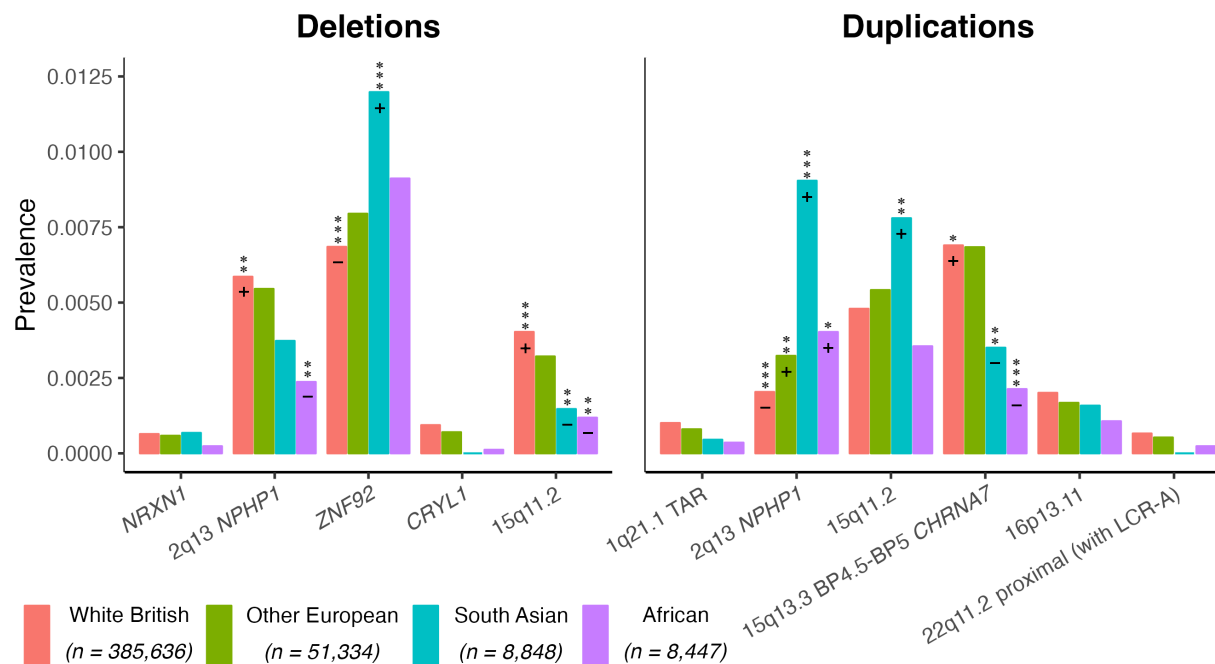

455  
456  
457  
458  
459  
460  
461  
462  
463  
464  
465  
466  
467  
468  
469  
470

**Fig. 2: Prevalence of individual recurrent CNVs across ancestry groups in the UK Biobank.**

There were significant differences between expected and observed counts for 6 out of the 11 recurrent CNVs selected for analysis,  $\chi^2 = 425.3$ , simulated  $p$ -value  $< .0005$  (2000 replicates). Carrier prevalence was calculated as the number of carriers of a given recurrent CNV divided by the total number of individuals in that ancestry group. Plus and minus signs indicate that the standardized residuals were statistically significantly higher or lower than zero, respectively, after FDR correction. \*FDR-corrected  $p$ -value  $< .05$ ; \*\*FDR-corrected  $p$ -value  $< .005$ ; \*\*\*FDR-corrected  $p$ -value  $< .0005$ . An additional category ("none of the above") that was included in the chi-square test is not shown in the bar chart.

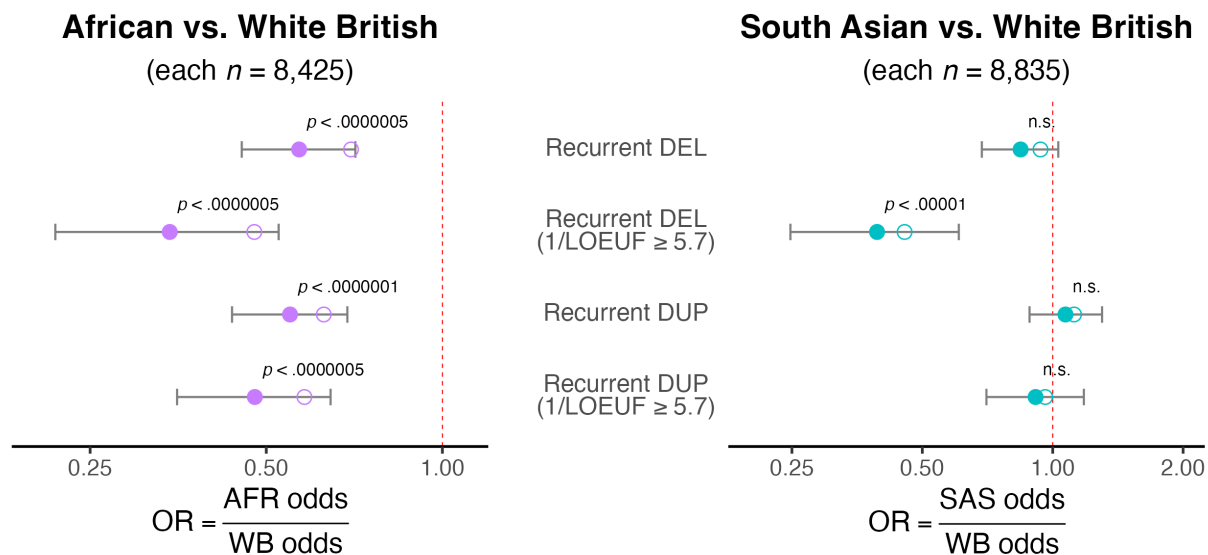

471  
 472 **Fig. 3: Odds of carrying deleterious CNVs in AFR- and SAS-ancestry individuals compared to**  
 473 **WB individuals in the UK Biobank after propensity-score matching on Townsend deprivation**  
 474 **index, age, and sex.** Odds were computed as the number of carriers divided by the number of  
 475 non-carriers of a given type of recurrent CNV. Odds ratios (ORs) were computed as AFR odds  
 476 divided by WB odds (purple dots) or SAS odds divided by WB odds (blue dots) using unmatched  
 477 (open dots) or matched (filled dots) data. Error bars indicate 95% Fisher confidence limits for  
 478 the OR computed using matched data, and the  $p$ -value is for the corresponding two-sided  
 479 Fisher's exact test for that OR. The red dashed lines indicate the expected OR of 1 (i.e., equal  
 480 odds). AFR odds were lower than the WB odds at each level of filtering, but SAS odds were not  
 481 consistently lower than the WB odds. Unmatched odds were calculated using data from  
 482 385,636 White British (WB), 8,447 African (AFR), and 8,848 South Asian (SAS) individuals.

483  
 484  
 485

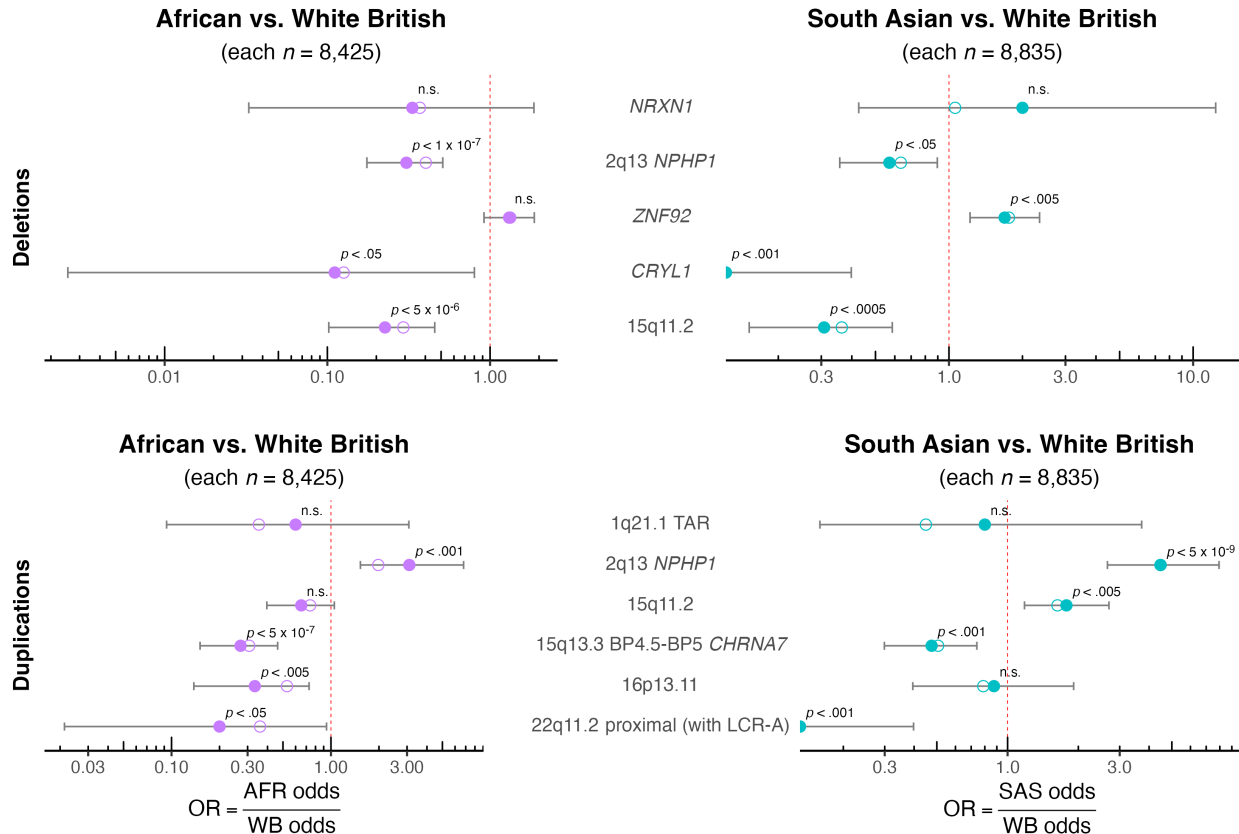

486  
 487 **Fig. 4: The odds of carrying individual recurrent CNVs for non-EUR compared to WB ancestry**  
 488 **groups in the UK Biobank.** Odds were computed as the number of carriers divided by the  
 489 number of non-carriers of a given recurrent CNV. Odds ratios (ORs) were computed as AFR  
 490 odds divided by WB odds (purple dots) or SAS odds divided by WB odds (blue dots) using  
 491 unmatched (open dots) or matched (filled dots) data. Error bars indicate 95% Fisher confidence  
 492 limits for the OR computed using matched data, and the  $p$ -value is for the corresponding two-  
 493 sided Fisher's exact test for that OR. The red dashed lines indicate the expected OR of 1 (i.e.,  
 494 equal odds). Compared to the WB odds, AFR odds were significantly lower for 6 and  
 495 significantly higher for 1 of the 11 selected recurrent CNVs. SAS odds were significantly lower  
 496 than WB odds for 5 of the same 6 recurrent CNVs and significantly higher than WB for 3  
 497 recurrent CNVs, including the same one observed to be higher for AFR. The two blue half  
 498 circles correspond to ORs of zero; neither of those recurrent CNVs were observed in the SAS  
 499 ancestry group. Unmatched odds were calculated using data from 385,636 White British (WB),  
 500 8,447 African (AFR), and 8,848 South Asian (SAS) individuals.  
 501  
 502

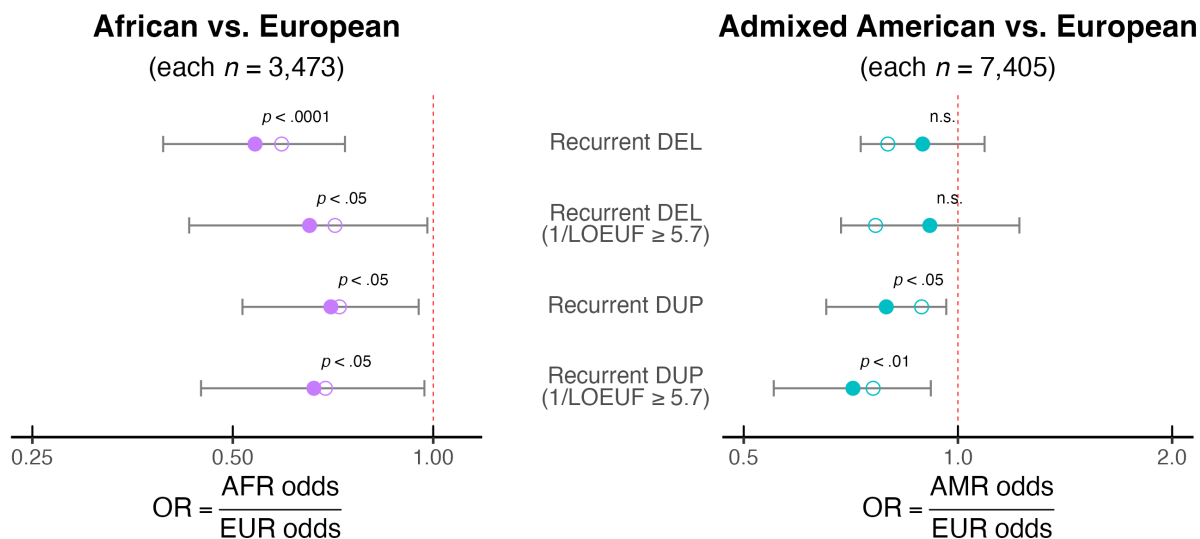

503  
 504 **Fig. 5: Odds of carrying deleterious CNVs in AFR- and AMR-ancestry individuals compared to**  
 505 **EUR-individuals in SPARK after propensity-score matching on autism spectrum disorder and**  
 506 **intellectual disability status, age, and sex.** Odds were computed as the number of carriers  
 507 divided by the number of non-carriers of a given type of recurrent CNV. Odds ratios (ORs) were  
 508 computed as AFR odds divided by EUR odds (purple dots) or AMR odds divided by WB odds  
 509 (blue dots) using unmatched (open dots) or matched (filled dots) data. Error bars indicate 95%  
 510 Fisher confidence limits for the OR computed using matched data, and the  $p$ -value is for the  
 511 corresponding two-sided Fisher's exact test for that OR. The red dashed lines indicate the  
 512 expected OR of 1 (i.e., equal odds). AFR carrier odds were lower than the EUR odds at each  
 513 level of filtering, but AMR odds were significantly lower only for recurrent DUP carriers.  
 514 Unmatched odds were calculated using data from 46,869 European (EUR), 3,680 African (AFR),  
 515 and 7,870 admixed American (AMR) individuals.  
 516



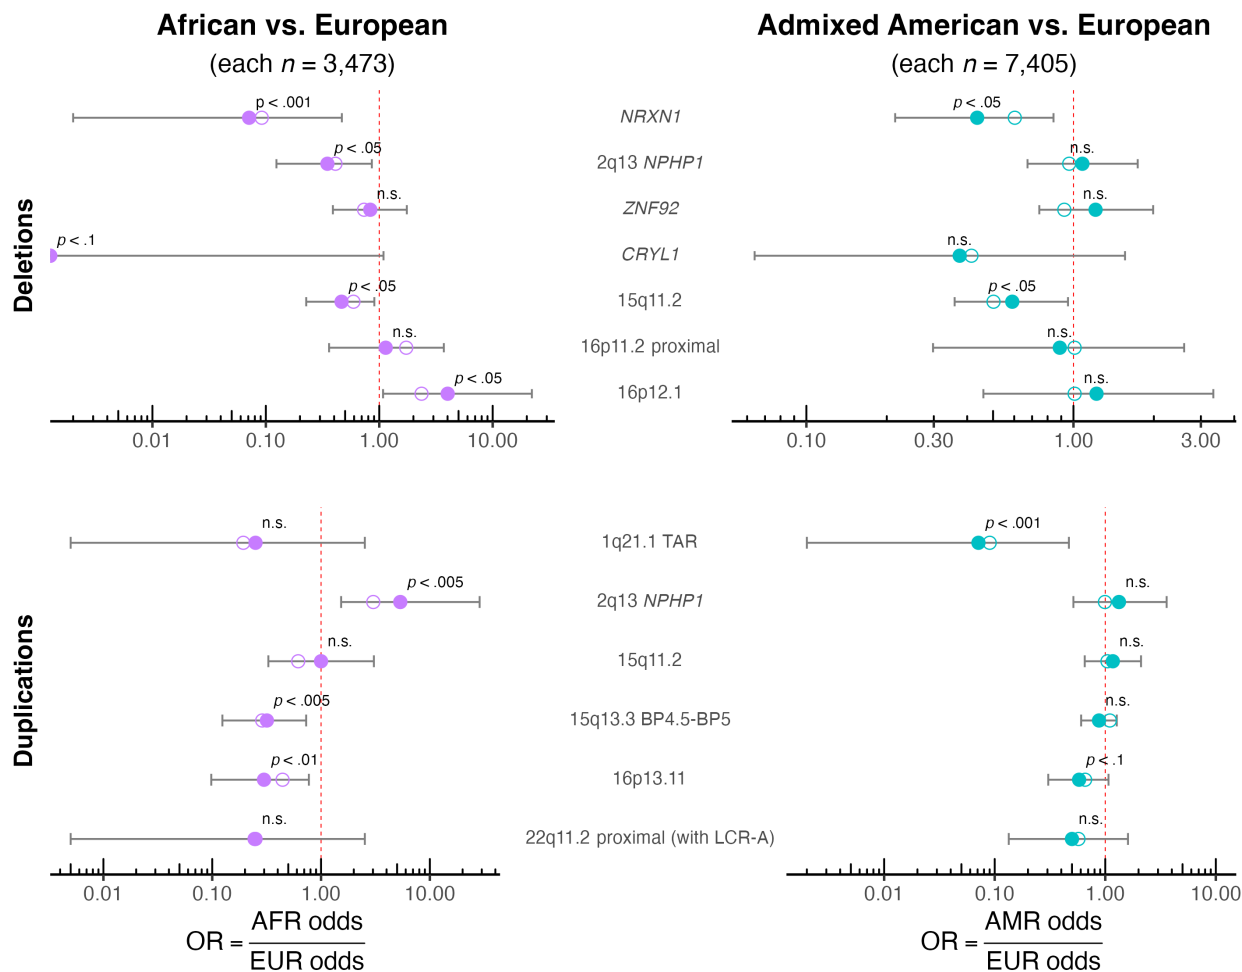

517  
 518 **Fig. 6: Odds of carrying individual recurrent CNVs for non-EUR compared to EUR ancestry**  
 519 **groups in SPARK.** Odds were computed as the number of carriers divided by the number of  
 520 non-carriers of a given recurrent CNV. Odds ratios (ORs) were computed as AFR odds divided  
 521 by EUR odds (purple dots) or AMR odds divided by EUR odds (blue dots) using unmatched  
 522 (open dots) or matched (filled dots) data. Error bars indicate 95% Fisher confidence limits for  
 523 the OR computed using matched data, and the  $p$ -value is for the corresponding two-sided  
 524 Fisher's exact test for that OR. The red dashed lines indicate the expected OR of 1 (i.e., equal  
 525 odds). The purple half circle corresponds to an OR of zero; this recurrent CNV was not  
 526 observed in the AFR ancestry group. Unmatched odds were calculated using data from 46,869  
 527 European (EUR), 3,680 African (AFR), and 7,870 admixed American (AMR) individuals.

528  
 529  
 530  
 531  
 532

533

534 **Extended Data**  
535

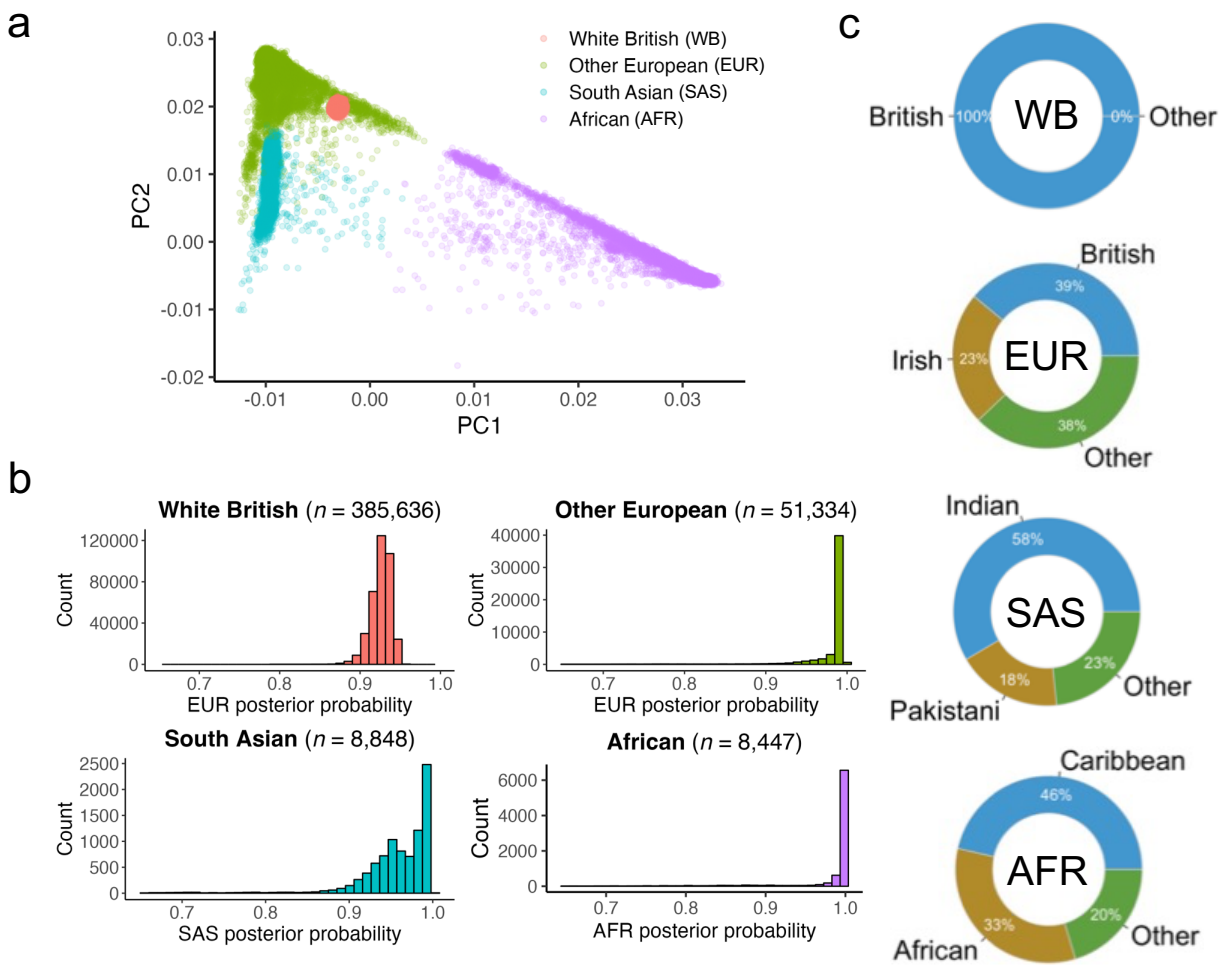

536  
537  
538 **Extended Data Fig. 1: Genetic ancestry and self-identified ethnicity of UK Biobank CNV study**  
539 **participants.** **a.** The first two ancestry principal components (PCs) are plotted with colors  
540 indicating inferred genetic ancestry. The subset of European (EUR)-ancestry individuals with  
541 self-declared white British (WB) ethnicity as defined by Data-Field 22006 is also shown. **b.**  
542 Genetic ancestry was called when the posterior probability was at least 0.65, but 93.2% of the  
543 calls were made with posterior probability  $\geq 0.9$ . **c.** Self-declared ethnicity varied within the  
544 EUR, South Asian (SAS), and African (AFR) genetic ancestry groups; 100% of the individuals  
545 included in the WB subset of the EUR-ancestry group identified themselves as being British.  
546

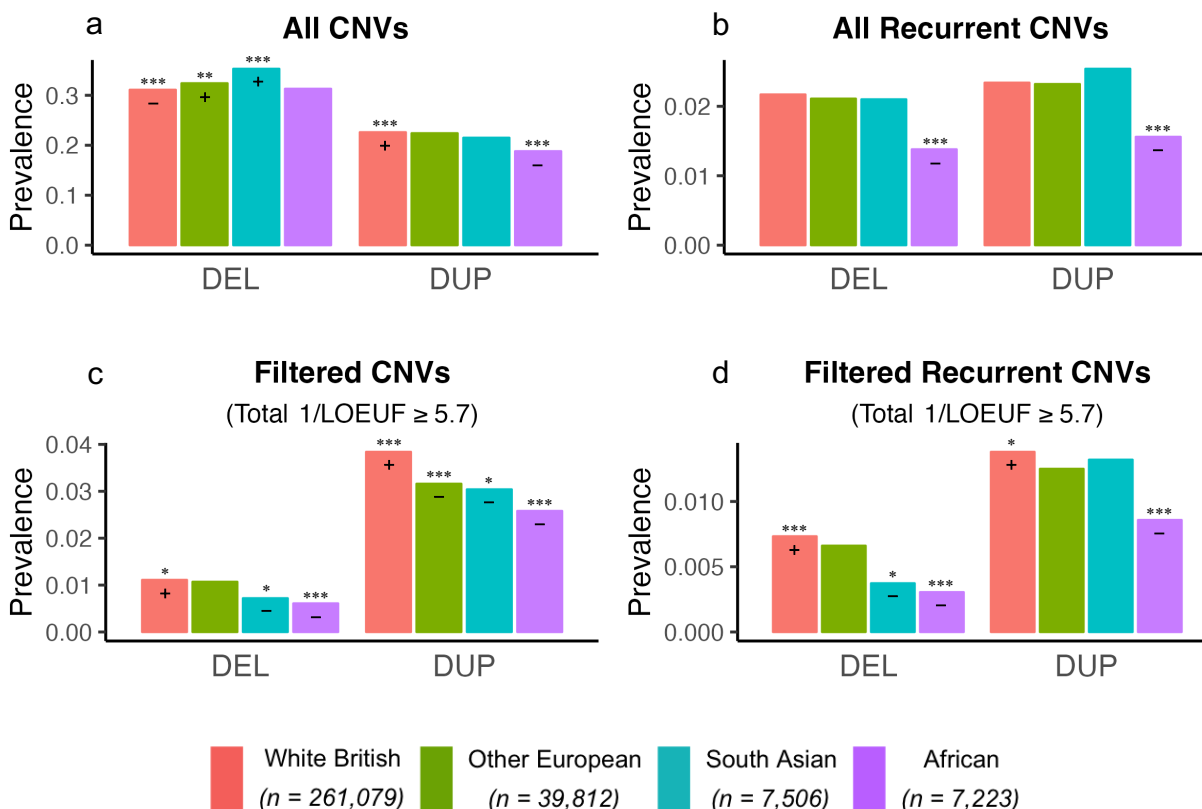

547  
548

549 **Extended Data Fig. 2: CNV carrier prevalence in the UK Biobank by ancestry after excluding**  
 550 **all third-degree or closer relatives.** These results are essentially the same to those obtained  
 551 prior to excluding relatives (compare to Fig. 1). **a.** When CNVs are not filtered based on  
 552 recurrence or burden, deletion (DEL) carrier prevalence is higher than expected for the South  
 553 Asian ancestry (SAS) group, and duplication (DUP) carrier prevalence is lower than expected for  
 554 the African ancestry (AFR) group ( $\chi^2 = 126.67$ ). **b.** When considering only recurrent CNVs,  
 555 there were fewer AFR-ancestry DEL and DUP carriers than expected ( $\chi^2 = 42.07$ ). **c.** Filtering  
 556 instead on burden (total 1/LOEUF  $\geq 5.7$ ), there were fewer DEL and DUP carriers than expected  
 557 for both the AFR and SAS groups ( $\chi^2 = 108.76$ ). **d.** Limiting to carriers of recurrent CNVs with  
 558 total 1/LOEUF  $\geq 5.7$ , DEL carrier prevalence was lower than expected for both AFR and SAS, but  
 559 DUP carrier prevalence was only lower than expected for AFR ( $\chi^2 = 50.43$ ). Plus signs indicate  
 560 significantly higher than expected carrier prevalence, and minus signs indicate significantly  
 561 lower than expected carrier prevalence. Ancestry-specific carrier prevalence was computed as  
 562 the number of carriers of at least one DEL (or DUP) divided by the total number of individuals in  
 563 that ancestry group. Simulated  $p$ -values (2000 replicates) were less than .0005 for all four chi-  
 564 square tests of independence. 1/LOEUF, inverse loss-of-function observed/expected upper-  
 565 bound fraction; \*FDR-corrected  $p$ -value  $< .05$ ; \*\*FDR-corrected  $p$ -value  $< .005$ ; \*\*\*FDR-  
 566 corrected  $p$ -value  $< .0005$ . An additional category ("Neither") that was included in each chi-  
 567 square test is not shown in the bar charts.

568  
569

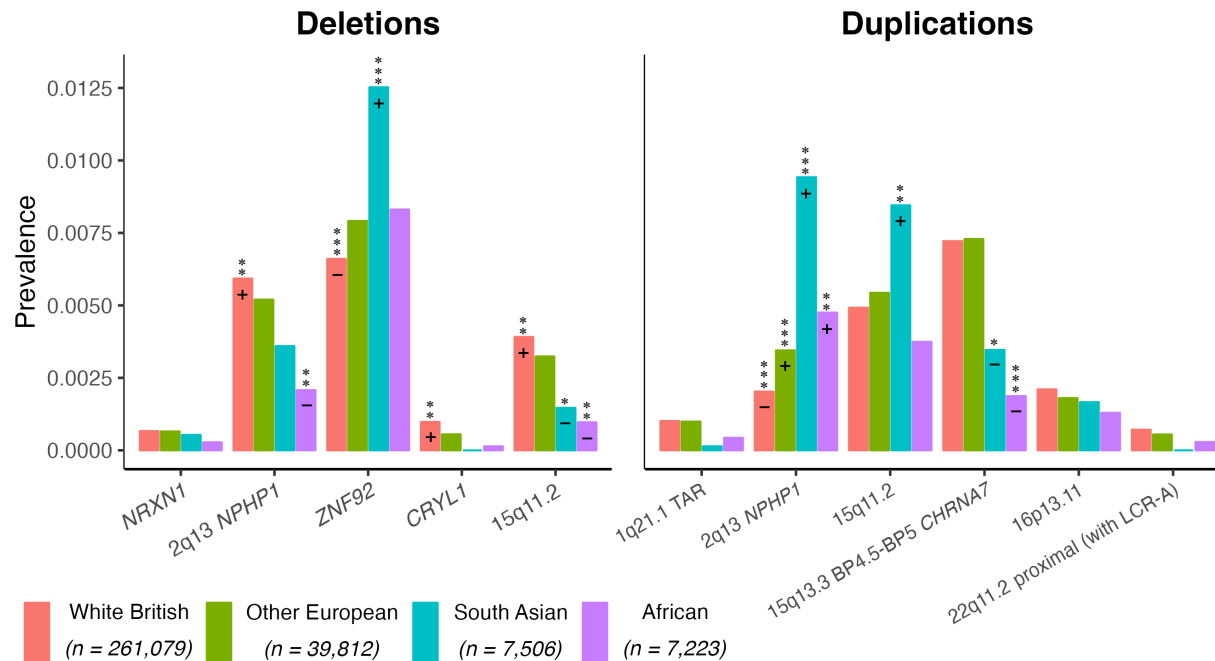

570  
571

572 **Extended Data Fig. 3: Carrier prevalence for specific recurrent CNVs by ancestry in the UK**  
573 **Biobank after excluding all third-degree or closer relatives.** These results are essentially the  
574 same to those obtained prior to excluding relatives (compare to Fig. 2). There were significant  
575 differences between expected and observed counts for 7 out of the 11 recurrent CNVs selected  
576 for analysis,  $\chi^2 = 397.75$ , simulated  $p$ -value < .0005 (2000 replicates). Carrier prevalence was  
577 calculated as the number of carriers of a given recurrent CNV divided by the total number of  
578 individuals in that ancestry group. Plus and minus signs indicate that the standardized residuals  
579 were statistically significantly higher or lower than zero, respectively, after FDR correction.

580 \*FDR-corrected  $p$ -value < .05; \*\*FDR-corrected  $p$ -value < .005; \*\*\*FDR-corrected  $p$ -value <  
581 .0005. An additional category ("none of the above") that was included in the chi-square test is  
582 not shown in the bar chart.

583  
584

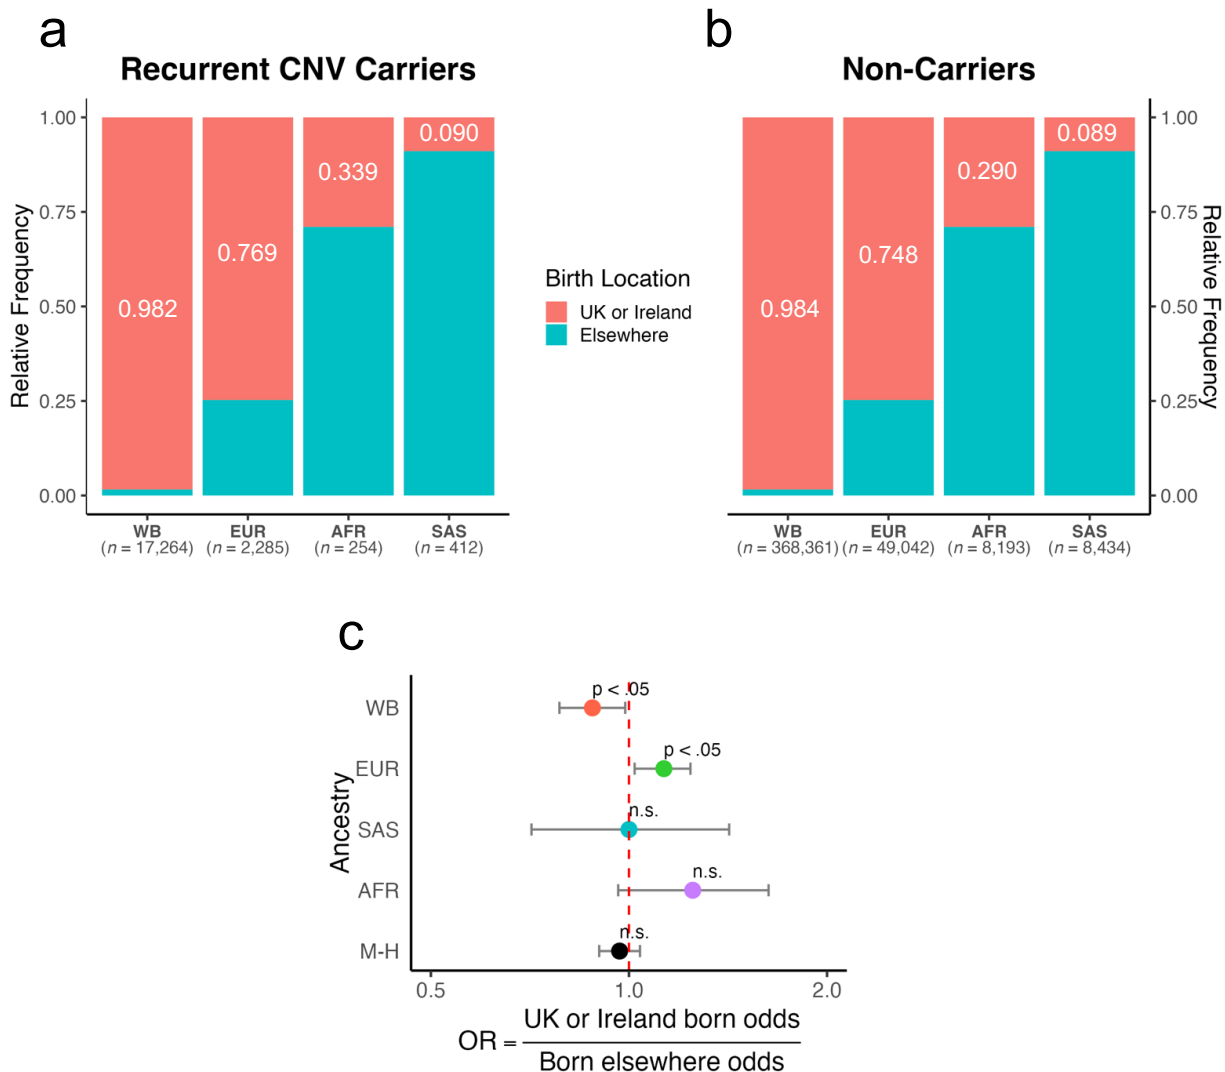

585  
 586  
 587 **Extended Data Fig. 4: Birth locations of UK Biobank recurrent CNV carriers and non-carriers.**  
 588 Overall, similar proportions of recurrent CNV carriers (a) and non-carriers (b) were born in  
 589 either the UK or the Republic of Ireland. (c) A Mantel-Haenszel test of homogeneity indicated  
 590 the birth location odds ratios (ORs) were stratified by ancestry ( $\chi^2 = 12.641, p = .005$ ).  
 591 Ancestry-specific ORs suggest that WB recurrent CNV carriers are less likely (OR = 0.880,  
 592 Fisher's exact test  $p < .05$ ) whereas EUR recurrent CNV carriers are more likely (OR = 1.13,  
 593 Fisher's exact test  $p < .05$ ) to have been born in the UK or Ireland than elsewhere; the birth-  
 594 location ORs for the AFR and SAS ancestry groups did not significantly differ from 1. The  
 595 Mantel-Haenszel (M-H) pooled OR also did not significantly differ from 1. Note that 11 White  
 596 British (WB), 7 other European (EUR), 2 South Asian (SAS), and 0 African (AFR) recurrent CNV  
 597 carriers were missing birth location data; no non-carriers were missing this data. Odds were  
 598 calculated as the number of recurrent CNV carriers divided by the number of non-carriers. Error  
 599 bars show 95% Wald confidence limits for the ORs.  
 600

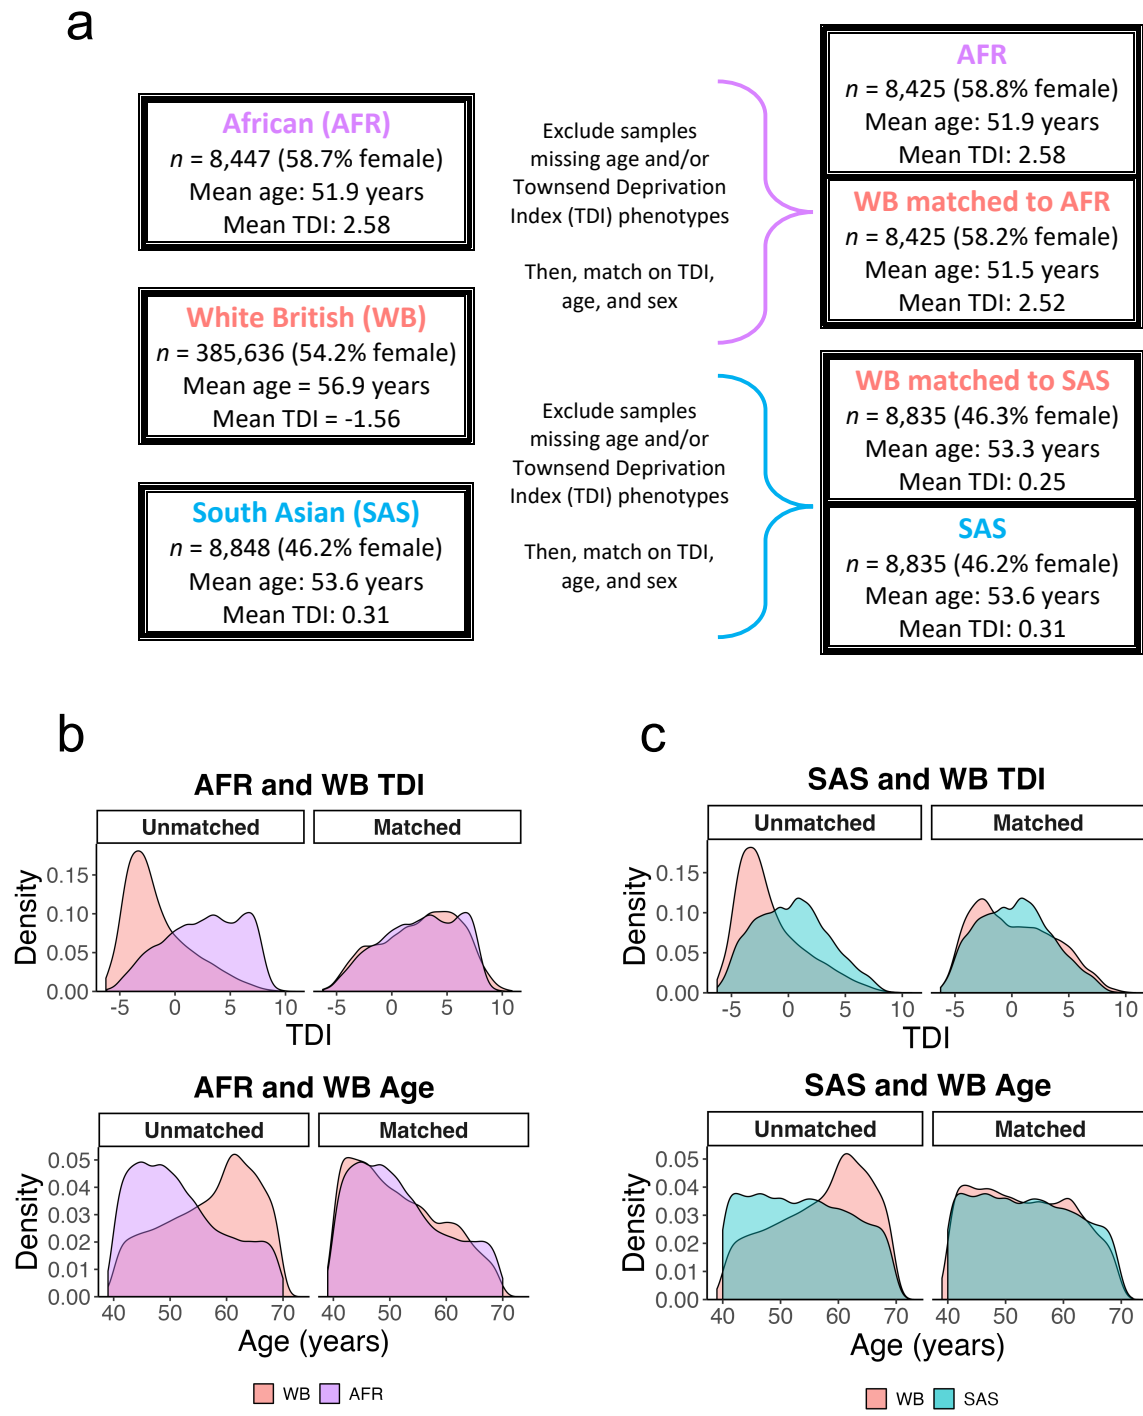

601  
 602  
 603  
 604  
 605  
 606  
 607  
 608

**Extended Data Fig. 5: UK Biobank propensity-score matching protocol.** **a.** 1:1 nearest-neighbor matching was performed after excluding subjects who were missing age and/or Townsend deprivation index (TDI) data. Two WB subsamples were matched to the filtered AFR sample (*n* = 8,425) and the filtered SAS sample (*n* = 8,848) based on TDI, age, and sex. The overlap between the density plots for TDI (top) and age (bottom) was dramatically improved between **(b)** the AFR and WB samples and **(c)** the SAS and WB samples after matching.

609

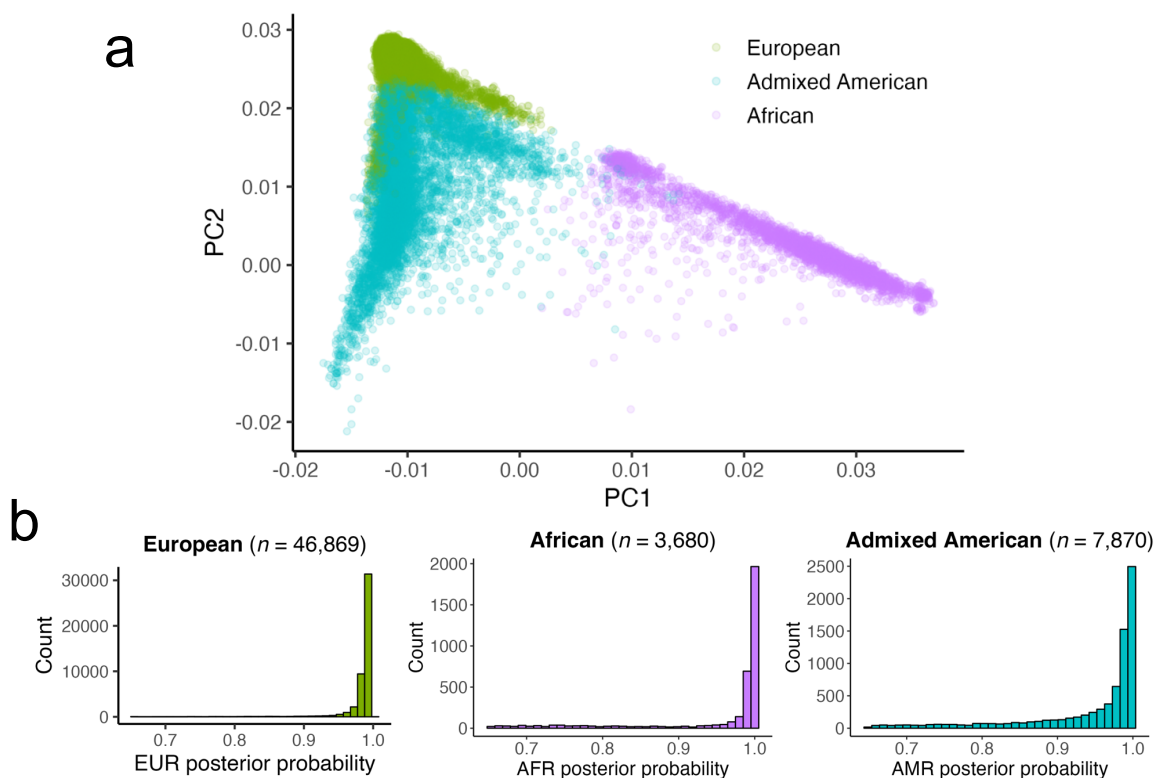

610

611

612 **Extended Data Fig. 6: Genetic ancestry of SPARK CNV study participants.** **a.** The first two  
613 ancestry principal components (PCs) are plotted with colors indicating inferred genetic  
614 ancestry. **b.** Genetic ancestry was called when the posterior probability was at least 0.65, but  
615 96.8% of the European (EUR), 83.3% of African (AFR), and 79.4% of admixed American (AMR)  
616 ancestry calls were made with posterior probability  $\geq 0.9$ .

617

a

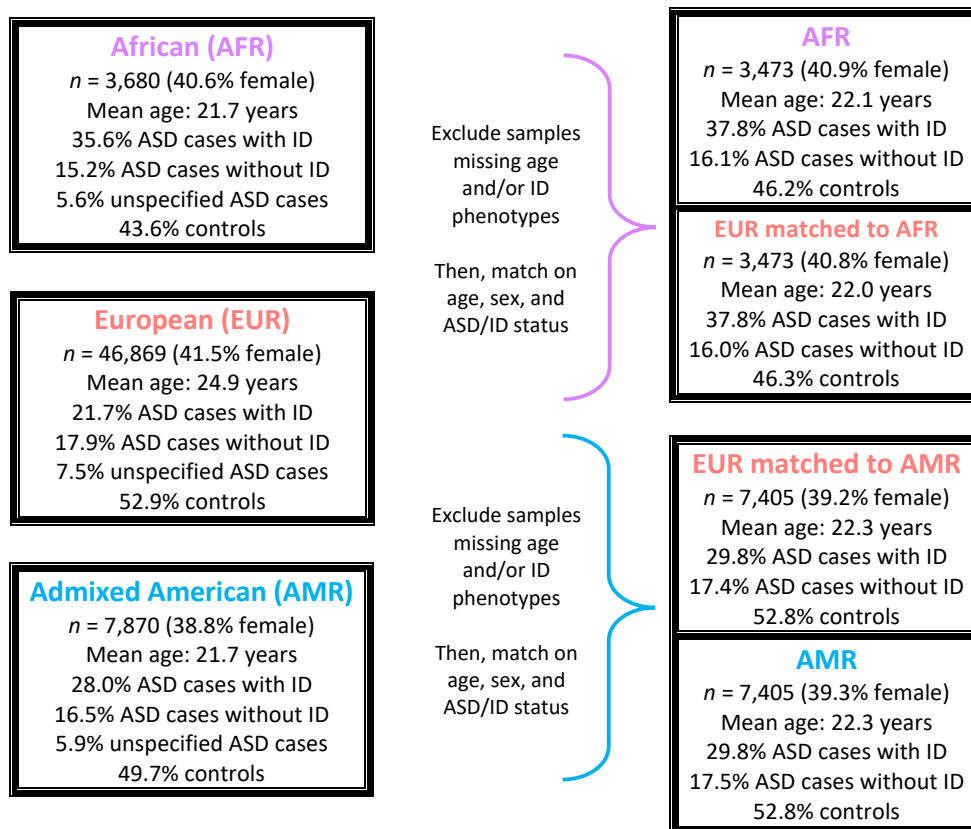

b

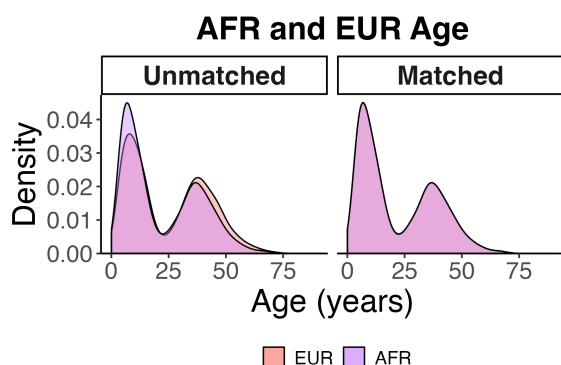

c

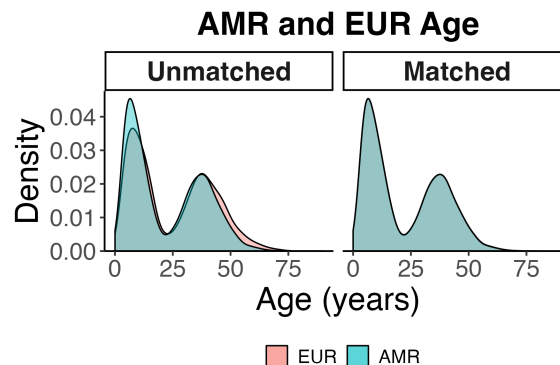

618  
619

620 **Extended Data Fig. 7: SPARK propensity-score matching protocol.** a. 1:1 nearest-neighbor  
 621 matching was performed after excluding subjects who were missing age and/or intellectual  
 622 disability (ID) phenotypes. Two EUR subsamples were matched to the filtered AFR sample ( $n =$   
 623 3,473) and the filtered AMR sample ( $n = 7,405$ ) based on combined autism spectrum disorder  
 624 (ASD) and ID status, age, and sex. The overlap between the density plots for age was  
 625 dramatically improved between (b) the AFR and EUR samples and (c) the AMR and EUR samples  
 626 after matching.

627  
628



629 **Literature Cited**

630

- 631 1. Pös, O. *et al.* DNA copy number variation: Main characteristics, evolutionary  
632 significance, and pathological aspects. *Biomedical Journal* **44**, 548-559 (2021).
- 633 2. Kendall, K.M. *et al.* Cognitive performance and functional outcomes of carriers of  
634 pathogenic copy number variants: Analysis of the UK Biobank. *The British Journal of*  
635 *Psychiatry* **214**, 297-304 (2019).
- 636 3. Alexander-Bloch, A. *et al.* Copy number variant risk scores associated with cognition,  
637 psychopathology, and brain structure in youths in the Philadelphia Neurodevelopmental  
638 Cohort. *JAMA Psychiatry* (2022).
- 639 4. Mollon, J., Almasy, L., Jacquemont, S. & Glahn, D.C. The contribution of copy number  
640 variants to psychiatric symptoms and cognitive ability. *Molecular Psychiatry* **28**, 1480-  
641 1493 (2023).
- 642 5. Owen, D. *et al.* Effects of pathogenic CNVs on physical traits in participants of the UK  
643 Biobank. *BMC Genomics* **19**, 867 (2018).
- 644 6. Hujoel, M.L.A. *et al.* Influences of rare copy-number variation on human complex traits.  
645 *Cell* **185**, 4233-4248.e27 (2022).
- 646 7. Auwerx, C. *et al.* The individual and global impact of copy-number variants on complex  
647 human traits. *The American Journal of Human Genetics* **109**, 647-668 (2022).
- 648 8. Crawford, K. *et al.* Medical consequences of pathogenic CNVs in adults: Analysis of the  
649 UK Biobank. *Journal of Medical Genetics* **56**, 131 (2019).
- 650 9. Aguirre, M., Rivas, M.A. & Priest, J. Phenome-wide burden of copy-number variation in  
651 the UK Biobank. *Am J Hum Genet* **105**, 373-383 (2019).
- 652 10. Collins, R.L. *et al.* A cross-disorder dosage sensitivity map of the human genome. *Cell*  
653 **185**, 3041-3055.e25 (2022).
- 654 11. Auwerx, C. *et al.* Rare copy-number variants as modulators of common disease  
655 susceptibility. *Genome Medicine* **16**, 5 (2024).
- 656 12. Merikangas, A.K., Corvin, A.P. & Gallagher, L. Copy-number variants in  
657 neurodevelopmental disorders: Promises and challenges. *Trends in Genetics* **25**, 536-544  
658 (2009).
- 659 13. Coe, B.P. *et al.* Refining analyses of copy number variation identifies specific genes  
660 associated with developmental delay. *Nature Genetics* **46**, 1063-1071 (2014).

- 661 14. Birnbaum, R., Mahjani, B., Loos, R.J.F. & Sharp, A.J. Clinical characterization of copy  
662 number variants associated with neurodevelopmental disorders in a large-scale  
663 multiancestry biobank. *JAMA Psychiatry* **79**, 250-259 (2022).
- 664 15. Zarrei, M. *et al.* Gene copy number variation and pediatric mental  
665 health/neurodevelopment in a general population. *Human Molecular Genetics* **32**, 2411-  
666 2421 (2023).
- 667 16. Malhotra, D. & Sebat, J. CNVs: Harbingers of a rare variant revolution in psychiatric  
668 genetics. *Cell* **148**, 1223-1241 (2012).
- 669 17. Calle Sánchez, X. *et al.* Comparing copy number variations in a Danish case cohort of  
670 individuals with psychiatric disorders. *JAMA Psychiatry* **79**, 59-69 (2022).
- 671 18. Rees, E. & Kirov, G. Copy number variation and neuropsychiatric illness. *Current Opinion*  
672 *in Genetics & Development* **68**, 57-63 (2021).
- 673 19. Sebat, J. *et al.* Strong association of de novo copy number mutations with autism.  
674 *Science* **316**, 445-449 (2007).
- 675 20. Leppa, Virpi M. *et al.* Rare inherited and de novo CNVs reveal complex contributions to  
676 ASD risk in multiplex families. *The American Journal of Human Genetics* **99**, 540-554  
677 (2016).
- 678 21. Fu, J.M. *et al.* Rare coding variation provides insight into the genetic architecture and  
679 phenotypic context of autism. *Nature Genetics* **54**, 1320-1331 (2022).
- 680 22. Vicari, S. *et al.* Copy number variants in autism spectrum disorders. *Progress in Neuro-*  
681 *Psychopharmacology and Biological Psychiatry* **92**, 421-427 (2019).
- 682 23. Marshall, C.R. *et al.* Contribution of copy number variants to schizophrenia from a  
683 genome-wide study of 41,321 subjects. *Nature Genetics* **49**, 27-35 (2017).
- 684 24. Bassett, A.S., Scherer, S.W. & Brzustowicz, L.M. Copy number variations in  
685 schizophrenia: Critical review and new perspectives on concepts of genetics and disease.  
686 *American Journal of Psychiatry* **167**, 899-914 (2010).
- 687 25. Maury, E.A. *et al.* Schizophrenia-associated somatic copy-number variants from 12,834  
688 cases reveal recurrent NRXN1 and ABCB11 disruptions. *Cell Genomics* **3**, 100356 (2023).
- 689 26. McElroy, J.P., Nelson, M.R., Caillier, S.J. & Oksenberg, J.R. Copy number variation in  
690 African Americans. *BMC Genetics* **10**, 15 (2009).
- 691 27. Nyangiri, O.A. *et al.* Copy number variation in human genomes from three major ethno-  
692 linguistic groups in Africa. *BMC Genomics* **21**, 289-289 (2020).

- 693 28. Wineinger, N.E. *et al.* Characterization of autosomal copy-number variation in African  
694 Americans: The HyperGEN study. *European Journal of Human Genetics* **19**, 1271-1275  
695 (2011).
- 696 29. Yilmaz, F. *et al.* Genome-wide copy number variations in a large cohort of Bantu African  
697 children. *BMC Medical Genomics* **14**, 129 (2021).
- 698 30. Gautam, P. *et al.* Spectrum of large copy number variations in 26 diverse Indian  
699 populations: Potential involvement in phenotypic diversity. *Human Genetics* **131**, 131-  
700 143 (2012).
- 701 31. Gao, Y. *et al.* A pangenome reference of 36 Chinese populations. *Nature* **619**, 112-121  
702 (2023).
- 703 32. Sánchez, S. *et al.* Frequent copy number variants in a cohort of Mexican-Mestizo  
704 individuals. *Molecular Cytogenetics* **16**, 2 (2023).
- 705 33. Redon, R. *et al.* Global variation in copy number in the human genome. *Nature* **444**, 444-  
706 454 (2006).
- 707 34. Wong, K.K. *et al.* A comprehensive analysis of common copy-number variations in the  
708 human genome. *The American Journal of Human Genetics* **80**, 91-104 (2007).
- 709 35. Armengol, L. *et al.* Identification of copy number variants defining genomic differences  
710 among major human groups. *PLOS ONE* **4**, e7230 (2009).
- 711 36. Itsara, A. *et al.* Population analysis of large copy number variants and hotspots of human  
712 genetic disease. *The American Journal of Human Genetics* **84**, 148-161 (2009).
- 713 37. Sudmant, P.H. *et al.* Global diversity, population stratification, and selection of human  
714 copy-number variation. *Science* **349**, aab3761 (2015).
- 715 38. Sudmant, P.H. *et al.* An integrated map of structural variation in 2,504 human genomes.  
716 *Nature* **526**, 75-81 (2015).
- 717 39. Collins, R.L. *et al.* A structural variation reference for medical and population genetics.  
718 *Nature* **581**, 444-451 (2020).
- 719 40. Ebert, P. *et al.* Haplotype-resolved diverse human genomes and integrated analysis of  
720 structural variation. *Science* **372**, eabf7117 (2021).
- 721 41. Bamshad, M., Wooding, S., Salisbury, B.A. & Stephens, J.C. Deconstructing the  
722 relationship between genetics and race. *Nature Reviews Genetics* **5**, 598-609 (2004).
- 723 42. Edwards, A.W.F. Human genetic diversity: Lewontin's fallacy. *BioEssays* **25**, 798-801  
724 (2003).

- 725 43. Sirugo, G., Williams, S.M. & Tishkoff, S.A. The missing diversity in human genetic studies.  
726 *Cell* **177**, 26-31 (2019).
- 727 44. Szpiech, Z.A. *et al.* Ancestry-dependent enrichment of deleterious homozygotes in runs  
728 of homozygosity. *The American Journal of Human Genetics* **105**, 747-762 (2019).
- 729 45. Esoh, K. & Wonkam, A. Evolutionary history of sickle-cell mutation: Implications for  
730 global genetic medicine. *Human Molecular Genetics* **30**, R119-R128 (2021).
- 731 46. Daneshpajouhnejad, P., Kopp, J.B., Winkler, C.A. & Rosenberg, A.Z. The evolving story of  
732 apolipoprotein L1 nephropathy: The end of the beginning. *Nature Reviews Nephrology*  
733 **18**, 307-320 (2022).
- 734 47. Nédélec, Y. *et al.* Genetic ancestry and natural selection drive population differences in  
735 immune responses to pathogens. *Cell* **167**, 657-669.e21 (2016).
- 736 48. Randolph, H.E. *et al.* Genetic ancestry effects on the response to viral infection are  
737 pervasive but cell type specific. *Science* **374**, 1127-1133 (2021).
- 738 49. Yang, H.-C., Chen, C.-W., Lin, Y.-T. & Chu, S.-K. Genetic ancestry plays a central role in  
739 population pharmacogenomics. *Communications Biology* **4**, 171 (2021).
- 740 50. Corpas, M. *et al.* Addressing ancestry and sex bias in pharmacogenomics. *Annual Review*  
741 *of Pharmacology and Toxicology* (2023).
- 742 51. Karczewski, K.J. *et al.* The mutational constraint spectrum quantified from variation in  
743 141,456 humans. *Nature* **581**, 434-443 (2020).
- 744 52. Schrider, D.R. & Hahn, M.W. Gene copy-number polymorphism in nature. *Proc Biol Sci*  
745 **277**, 3213-21 (2010).
- 746 53. Porubsky, D. *et al.* Recurrent inversion polymorphisms in humans associate with genetic  
747 instability and genomic disorders. *Cell* **185**, 1986-2005.e26 (2022).
- 748 54. Gouveia, M.H. *et al.* Unappreciated subcontinental admixture in europeans and  
749 european americans and implications for genetic epidemiology studies. *Nature*  
750 *Communications* **14**, 6802 (2023).
- 751 55. Auton, A. *et al.* A global reference for human genetic variation. *Nature* **526**, 68-74  
752 (2015).
- 753 56. Bick, A.G. *et al.* Genomic data in the All of Us research program. *Nature* (2024).
- 754 57. Hayeck, T.J. *et al.* Ancestry adjustment improves genome-wide estimates of regional  
755 intolerance. *Genetics* **221**, iyac050 (2022).

- 756 58. Lewis, A.C.F. *et al.* Getting genetic ancestry right for science and society. *Science* **376**,  
757 250-252 (2022).
- 758 59. National Academies of Sciences, Engineering, & Medicine. *Using population descriptors*  
759 *in genetics and genomics research: A new framework for an evolving field*, 240 (The  
760 National Academies Press, Washington, DC, 2023).
- 761 60. Marchini, J., Cardon, L.R., Phillips, M.S. & Donnelly, P. The effects of human population  
762 structure on large genetic association studies. *Nature Genetics* **36**, 512-517 (2004).
- 763 61. Tian, C., Gregersen, P.K. & Seldin, M.F. Accounting for ancestry: Population substructure  
764 and genome-wide association studies. *Human Molecular Genetics* **17**, R143-R150 (2008).
- 765 62. Bycroft, C. *et al.* The UK Biobank resource with deep phenotyping and genomic data.  
766 *Nature* **562**, 203-209 (2018).
- 767 63. Feliciano, P. *et al.* SPARK: A US cohort of 50,000 families to accelerate autism research.  
768 *Neuron* **97**, 488-493 (2018).
- 769 64. Wang, K. *et al.* PennCNV: An integrated hidden Markov model designed for high-  
770 resolution copy number variation detection in whole-genome snp genotyping data.  
771 *Genome Res* **17**, 1665-74 (2007).
- 772 65. Colella, S. *et al.* Quantisnp: An objective Bayes hidden-Markov model to detect and  
773 accurately map copy number variation using snp genotyping data. *Nucleic Acids Res* **35**,  
774 2013-25 (2007).
- 775 66. Jean-Louis, M. Python based parallel CNV calling prioritizing mpi4py usage and memory  
776 optimization. in *Zenodo* (2019).
- 777 67. Huguet, G. *et al.* Genome-wide analysis of gene dosage in 24,092 individuals estimates  
778 that 10,000 genes modulate cognitive ability. *Mol Psychiatry* **26**, 2663-2676 (2021).
- 779 68. Sanders, Stephan J. *et al.* Multiple recurrent de novo CNVs, including duplications of the  
780 7q11.23 Williams syndrome region, are strongly associated with autism. *Neuron* **70**, 863-  
781 885 (2011).
- 782 69. Manichaikul, A. *et al.* Robust relationship inference in genome-wide association studies.  
783 *Bioinformatics* **26**, 2867-2873 (2010).
- 784 70. Meyer, D. *et al.* Misc functions of the department of statistics, probability theory group  
785 (formerly: E1071), tu wien. 1.7-3 edn (<https://CRAN.R-project.org/package=e1071>),  
786 2020).
- 787 71. Ho, D., Imai, K., King, G. & Stuart, E.A. MatchIt: Nonparametric preprocessing for  
788 parametric causal inference. *Journal of Statistical Software* **42**, 1 - 28 (2011).

789 72. R Core Team. *R: A language and environment for statistical computing*, (R Foundation  
790 for Statistical Computing, Vienna, Austria, 2022).  
791
